# Supplementary material
Source: PubMed Central journal article supplement (PMC3769430)
Supplement: NIHMS496397-supplement-01.pdf [file NIHMS496397-supplement-01.pdf]

Supplemental Table 1. Statistical differences between generations of  $+/dfw^{i5}$  and controls.

|                     | 5.6 kHz | 8 kHz | 11.3 kHz | 16 kHz | 22.6 kHz | 32 kHz | 40 kHz |
|---------------------|---------|-------|----------|--------|----------|--------|--------|
| $+/+$ vs N3 $+/-$   | n.s.    | n.s.  | n.s.     | ***    | ***      | ***    | ***    |
| $+/+$ vs N4 $+/-$   | ***     | **    | *        | ***    | ***      | ***    | ***    |
| $+/+$ vs N5 $+/-$   | ***     | **    | **       | ***    | ***      | ***    | ***    |
| $+/+$ vs N6 $+/-$   | n.s.    | n.s.  | n.s.     | *      | ***      | ***    | ***    |
| $+/+$ vs N10 $+/-$  | n.s.    | n.s.  | n.s.     | n.s.   | ***      | ***    | ***    |
| N4 vs N5 ( $+/+$ )  | n.s.    | n.s.  | n.s.     | n.s.   | n.s.     | n.s.   | n.s.   |
| N5 vs N6 ( $+/+$ )  | n.s.    | n.s.  | n.s.     | n.s.   | n.s.     | n.s.   | n.s.   |
| N6 vs N10 ( $+/+$ ) | n.s.    | n.s.  | n.s.     | n.s.   | n.s.     | n.s.   | n.s.   |
| N3 vs N4 ( $+/-$ )  | n.s.    | n.s.  | n.s.     | n.s.   | n.s.     | n.s.   | n.s.   |
| N4 vs N5 ( $+/-$ )  | n.s.    | n.s.  | n.s.     | n.s.   | n.s.     | n.s.   | n.s.   |
| N5 vs N6 ( $+/-$ )  | *       | **    | ***      | ***    | ***      | n.s.   | n.s.   |
| N6 vs N10 ( $+/-$ ) | n.s.    | n.s.  | n.s.     | n.s.   | n.s.     | n.s.   | n.s.   |

A comparison of heterozygotes at each generation compared to grouped controls (n = 30) shows loss at many or all frequencies for mice in N3 (n = 3), N4 (n = 6) and N5 (n = 5). In N6 (n = 9) and N10 (n = 13) heterozygotes, loss was only significant at higher frequencies. Sensitivity in wild-type controls did not significantly change from one generation to the next (there were no N3 wild-type littermates negative at *ahl* to include in this comparison; n = 6 at N4; n = 4 at N5; n = 6 at N6; n = 14 at N10). Thresholds are statistically improved between N5 and N6 for  $+/dfw^{i5}$  mice at low and mid-frequencies. All comparisons were done using a two-way ANOVA with a Bonferroni post-test and significance values are indicated by the following: \*p < 0.05, \*\*p < 0.01 and \*\*\*p < 0.001.
